# Supplementary material for: Enhancing birefringence of non-π-conjugated sulfate systems through rare-earth metal-centered polyhedra
Source: Royal Society of Chemistry journal article supplement (doi:10.1039/d3ce00254c), 2023-01-01
Supplement: d3ce00254c1.pdf [file d3ce00254c1.pdf]

## Electronic Supporting Information

### Enhancing Birefringence of Non- $\pi$ -Conjugated Sulfate Systems Through Rare-Earth Metal-Centered Polyhedra

*Jingdong Yan,<sup>a,b</sup> Dongdong Chu,<sup>a,b</sup> Fangfang Zhang,<sup>a,b\*</sup> Zihua Yang,<sup>a,b</sup> Shilie Pan,  
and Xueling Hou<sup>a,b\*</sup>*

*<sup>a</sup>Research Center for Crystal Materials; CAS Key Laboratory of Functional Materials  
and Devices for Special Environments; Xinjiang Technical Institute of Physics &  
Chemistry, CAS, Xinjiang Key Laboratory of Electronic Information Materials and  
Devices, 40-1 South Beijing Road, Urumqi 830011, China.*

*<sup>b</sup>Center of Materials Science and Optoelectronics Engineering, University of Chinese  
Academy of Sciences, Beijing 100049, China.*

*\*Corresponding author, E-mails: ffzhang@ms.xjb.ac.cn, xlhou@ms.xjb.ac.cn*

## CONTENTS

**Tables S1 and S2.** Atomic coordinates ( $\times 10^4$ ), equivalent isotropic displacement parameters ( $\text{\AA}^2 \times 10^3$ ), and bond valence sum (BVS) calculations.  $U_{eq}$  is defined as one-third of the trace of the orthogonalized  $U_{ij}$  tensor.

**Tables S3 and S4.** Anisotropic displacement parameters ( $\text{\AA}^2$ ).

**Tables S5 and S6.** Selected bond lengths ( $\text{\AA}$ ) and angles ( $^\circ$ ).

**Figure S1.** Calculated powder XRD pattern of  $\text{NaLa}_2(\text{SO}_4)_2\text{F}_3$  and the powder XRD patterns after heating at 700 and 730  $^\circ\text{C}$ , respectively.

**Figure S2.** Calculated powder XRD pattern of  $\text{NaGd}_2(\text{SO}_4)_2\text{F}_3$  and the powder XRD patterns after heating at 600 and 630  $^\circ\text{C}$ , respectively.

**Table S1.** Atomic coordinates ( $\times 10^4$ ), equivalent isotropic displacement parameters ( $\text{\AA}^2 \times 10^3$ ), and bond valence sum (BVS) calculations for  $\text{NaGd}_2(\text{SO}_4)_2\text{F}_3$ .  $U(\text{eq})$  is defined as one-third of the trace of the orthogonalized  $U_{ij}$  tensor.

| Atom  | $x$     | $y$      | $z$     | $U(\text{eq})$ | BVS  |
|-------|---------|----------|---------|----------------|------|
| Na(1) | 5000    | 11198(3) | 2500    | 18(1)          | 1.04 |
| Gd(1) | 6185(1) | 5921(1)  | 4601(1) | 8(1)           | 3.09 |
| S(1)  | 6798(1) | 884(1)   | 6604(1) | 8(1)           | 6.09 |
| O(1)  | 6947(2) | 1520(3)  | 8466(3) | 14(1)          | 2.02 |
| O(2)  | 6196(2) | -893(3)  | 6083(3) | 13(1)          | 2.02 |
| O(3)  | 7778(2) | 494(3)   | 6790(3) | 15(1)          | 2.02 |
| O(4)  | 6329(2) | 2431(3)  | 5248(3) | 14(1)          | 2.14 |
| F(1)  | 5449(1) | 5559(3)  | 6586(3) | 14(1)          | 0.99 |
| F(2)  | 5000    | 7819(4)  | 2500    | 15(1)          | 1.02 |

**Table S2.** Atomic coordinates ( $\times 10^4$ ), equivalent isotropic displacement parameters ( $\text{\AA}^2 \times 10^3$ ), and bond valence sum (BVS) calculations for  $\text{NaLa}_2(\text{SO}_4)_2\text{F}_3$ .  $U(\text{eq})$  is defined as one-third of the trace of the orthogonalized  $U_{ij}$  tensor.

| <b>Atom</b> | <b><i>x</i></b> | <b><i>y</i></b> | <b><i>z</i></b> | <b><i>U</i>(eq)</b> | <b>BVS</b> |
|-------------|-----------------|-----------------|-----------------|---------------------|------------|
| Na(1)       | 5000            | 3824(2)         | 7500            | 22(1)               | 0.89       |
| La(1)       | 6204(1)         | 9086(1)         | 9630(1)         | 7(1)                | 3.26       |
| S(1)        | 3214(1)         | 4138(1)         | 3385(1)         | 8(1)                | 6.03       |
| O(1)        | 3061(1)         | 3498(2)         | 1572(2)         | 12(1)               | 2.03       |
| O(2)        | 3683(1)         | 2644(2)         | 4717(2)         | 14(1)               | 2.06       |
| O(3)        | 3798(1)         | 5866(2)         | 3871(3)         | 14(1)               | 1.99       |
| O(4)        | 2264(1)         | 4528(3)         | 3219(2)         | 13(1)               | 2.04       |
| F(1)        | 5000            | 7132(3)         | 7500            | 14(1)               | 1.06       |
| F(2)        | 5454(1)         | 9419(2)         | 11606(2)        | 13(1)               | 1.08       |

**Table S3.** Anisotropic displacement parameters ( $\text{\AA}^2$ ) for  $\text{NaGd}_2(\text{SO}_4)_2\text{F}_3$ .

| Atom  | $U_{11}$ | $U_{22}$ | $U_{33}$ | $U_{23}$ | $U_{13}$ | $U_{12}$ |
|-------|----------|----------|----------|----------|----------|----------|
| Na(1) | 18(1)    | 14(1)    | 19(1)    | 0        | 5(1)     | 0        |
| Gd(1) | 9(1)     | 7(1)     | 8(1)     | 0(1)     | 4(1)     | 0(1)     |
| S(1)  | 10(1)    | 7(1)     | 7(1)     | -1(1)    | 3(1)     | 0(1)     |
| O(1)  | 20(1)    | 13(1)    | 8(1)     | -2(1)    | 6(1)     | -1(1)    |
| O(2)  | 14(1)    | 10(1)    | 14(1)    | -3(1)    | 5(1)     | -4(1)    |
| O(3)  | 12(1)    | 14(1)    | 21(1)    | -4(1)    | 8(1)     | 0(1)     |
| O(4)  | 18(1)    | 10(1)    | 12(1)    | 2(1)     | 3(1)     | 2(1)     |
| F(1)  | 12(1)    | 17(1)    | 13(1)    | 1(1)     | 6(1)     | -2(1)    |
| F(2)  | 13(1)    | 9(1)     | 16(1)    | 0        | 0(1)     | 0        |

**Table S4.** Anisotropic displacement parameters ( $\text{\AA}^2$ ) for  $\text{NaLa}_2(\text{SO}_4)_2\text{F}_3$ .

| <b>Atom</b> | <b><math>U_{11}</math></b> | <b><math>U_{22}</math></b> | <b><math>U_{33}</math></b> | <b><math>U_{23}</math></b> | <b><math>U_{13}</math></b> | <b><math>U_{12}</math></b> |
|-------------|----------------------------|----------------------------|----------------------------|----------------------------|----------------------------|----------------------------|
| Na(1)       | 20(1)                      | 17(1)                      | 23(1)                      | 0                          | 6(1)                       | 0                          |
| La(1)       | 7(1)                       | 8(1)                       | 7(1)                       | 0(1)                       | 3(1)                       | 0(1)                       |
| S(1)        | 7(1)                       | 8(1)                       | 7(1)                       | 0(1)                       | 2(1)                       | 0(1)                       |
| O(1)        | 14(1)                      | 14(1)                      | 9(1)                       | -2(1)                      | 5(1)                       | 1(1)                       |
| O(2)        | 17(1)                      | 13(1)                      | 9(1)                       | 3(1)                       | 2(1)                       | 3(1)                       |
| O(3)        | 15(1)                      | 11(1)                      | 17(1)                      | -4(1)                      | 8(1)                       | -5(1)                      |
| O(4)        | 8(1)                       | 18(1)                      | 14(1)                      | -3(1)                      | 5(1)                       | 1(1)                       |
| F(1)        | 11(1)                      | 11(1)                      | 15(1)                      | 0                          | 2(1)                       | 0                          |
| F(2)        | 10(1)                      | 18(1)                      | 11(1)                      | -2(1)                      | 5(1)                       | 1(1)                       |

**Table S5.** Selected bond lengths (Å) and angles (°) for NaGd<sub>2</sub>(SO<sub>4</sub>)<sub>2</sub>F<sub>3</sub>.

| Selected bond lengths                        |            |                                               |            |
|----------------------------------------------|------------|-----------------------------------------------|------------|
| Gd(1) – F(1) <sup>#3</sup>                   | 2.4120(19) | Na(1) – O(2) <sup>#3</sup>                    | 2.550(2)   |
| Gd(1) – F(1)                                 | 2.3302(19) | Na(1) – O(4) <sup>#5</sup>                    | 2.427(2)   |
| Gd(1) – F(1) <sup>#4</sup>                   | 2.4810(19) | Na(1) – O(4) <sup>#8</sup>                    | 2.427(2)   |
| Gd(1) – F(2)                                 | 2.2767(15) | Na(1) – F(1) <sup>#10</sup>                   | 2.502(2)   |
| Gd(1) – O(1) <sup>#1</sup>                   | 2.643(2)   | Na(1) – F(1) <sup>#9</sup>                    | 2.502(2)   |
| Gd(1) – O(1) <sup>#3</sup>                   | 2.471(2)   | Na(1) – F(2)                                  | 2.284(3)   |
| Gd(1) – O(2) <sup>#5</sup>                   | 2.459(2)   | S(1) – O(1)                                   | 1.479(2)   |
| Gd(1) – O(3) <sup>#1</sup>                   | 2.665(3)   | S(1) – O(2)                                   | 1.463(2)   |
| Gd(1) – O(3) <sup>#6</sup>                   | 2.494(2)   | S(1)–O(3)                                     | 1.471(3)   |
| Gd(1) – O(4)                                 | 2.406(2)   | S(1)–O(4)                                     | 1.459(2)   |
| Na(1) – O(2) <sup>#4</sup>                   | 2.550(2)   |                                               |            |
| Selected bond angles                         |            |                                               |            |
| F(1) <sup>#3</sup> -Gd(1)-F(1) <sup>#4</sup> | 58.94(8)   | O(3) <sup>#6</sup> -Gd(1)-O(1) <sup>#1</sup>  | 65.39(8)   |
| F(1)-Gd(1)-F(1) <sup>#3</sup>                | 119.34(7)  | O(3) <sup>#6</sup> -Gd(1)-O(3) <sup>#1</sup>  | 104.42(8)  |
| F(1)-Gd(1)-F(1) <sup>#4</sup>                | 60.98(8)   | O(4)-Gd(1)-F(1) <sup>#4</sup>                 | 70.86(7)   |
| F(1) <sup>#4</sup> -Gd(1)-O(1) <sup>#1</sup> | 162.13(7)  | O(4)-Gd(1)-F(1) <sup>#3</sup>                 | 76.78(7)   |
| F(1)-Gd(1)-O(1) <sup>#3</sup>                | 140.48(7)  | O(4)-Gd(1)-O(1) <sup>#1</sup>                 | 92.69(8)   |
| F(1) <sup>#3</sup> -Gd(1)-O(1) <sup>#3</sup> | 90.62(7)   | O(4)-Gd(1)-O(1) <sup>#3</sup>                 | 138.80(8)  |
| F(1) <sup>#3</sup> -Gd(1)-O(1) <sup>#1</sup> | 125.41(7)  | O(4)-Gd(1)-O(2) <sup>#5</sup>                 | 140.64(8)  |
| F(1)-Gd(1)-O(1) <sup>#1</sup>                | 109.51(7)  | O(4)-Gd(1)-O(3) <sup>#1</sup>                 | 72.60(8)   |
| F(1)-Gd(1)-O(2) <sup>#5</sup>                | 70.39(7)   | O(4)-Gd(1)-O(3) <sup>#6</sup>                 | 72.79(8)   |
| F(1) <sup>#3</sup> -Gd(1)-O(2) <sup>#5</sup> | 138.95(7)  | O(2)-S(1)-O(1)                                | 109.60(14) |
| F(1) <sup>#3</sup> -Gd(1)-O(3) <sup>#6</sup> | 60.29(7)   | O(2)-S(1)-O(3)                                | 111.99(14) |
| F(1) <sup>#4</sup> -Gd(1)-O(3) <sup>#6</sup> | 114.01(7)  | O(3)-S(1)-O(1)                                | 103.88(14) |
| F(1)-Gd(1)-O(3) <sup>#1</sup>                | 58.68(7)   | O(4)-S(1)-O(1)                                | 111.25(14) |
| F(1) <sup>#3</sup> -Gd(1)-O(3) <sup>#1</sup> | 148.88(7)  | O(4)-S(1)-O(2)                                | 108.98(14) |
| F(1)-Gd(1)-O(3) <sup>#6</sup>                | 148.93(7)  | O(4)-S(1)-O(3)                                | 111.10(15) |
| F(1) <sup>#4</sup> -Gd(1)-O(3) <sup>#1</sup> | 114.22(7)  | F(1) <sup>#9</sup> -Na(1)-F(1) <sup>#10</sup> | 57.54(9)   |
| F(1)-Gd(1)-O(4)                              | 77.01(7)   | F(1) <sup>#9</sup> -Na(1)-O(2) <sup>#4</sup>  | 66.29(7)   |
| F(2)-Gd(1)-F(1) <sup>#3</sup>                | 66.73(6)   | F(1) <sup>#9</sup> -Na(1)-O(2) <sup>#3</sup>  | 122.94(9)  |
| F(2)-Gd(1)-F(1)                              | 95.76(5)   | F(1) <sup>#10</sup> -Na(1)-O(2) <sup>#4</sup> | 122.94(9)  |

|                                              |           |                                               |            |
|----------------------------------------------|-----------|-----------------------------------------------|------------|
| F(2)-Gd(1)-F(1) <sup>#4</sup>                | 65.55(6)  | F(1) <sup>#10</sup> -Na(1)-O(2) <sup>#3</sup> | 66.29(7)   |
| F(2)-Gd(1)-O(1) <sup>#3</sup>                | 71.66(7)  | F(2)-Na(1)-F(1) <sup>#10</sup>                | 151.23(5)  |
| F(2)-Gd(1)-O(1) <sup>#1</sup>                | 132.20(7) | F(2)-Na(1)-F(1) <sup>#9</sup>                 | 151.23(5)  |
| F(2)-Gd(1)-O(2) <sup>#5</sup>                | 72.77(8)  | F(2)-Na(1)-O(2) <sup>#3</sup>                 | 85.37(6)   |
| F(2)-Gd(1)-O(3) <sup>#1</sup>                | 141.78(6) | F(2)-Na(1)-O(2) <sup>#4</sup>                 | 85.37(6)   |
| F(2)-Gd(1)-O(3) <sup>#6</sup>                | 110.09(6) | F(2)-Na(1)-O(4) <sup>#5</sup>                 | 110.09(7)  |
| F(2)-Gd(1)-O(4)                              | 133.13(8) | F(2)-Na(1)-O(4) <sup>#8</sup>                 | 110.09(7)  |
| O(1) <sup>#3</sup> -Gd(1)-F(1) <sup>#4</sup> | 134.45(7) | O(2) <sup>#3</sup> -Na(1)-O(2) <sup>#4</sup>  | 170.73(13) |
| O(1) <sup>#3</sup> -Gd(1)-O(1) <sup>#1</sup> | 62.92(9)  | O(4) <sup>#5</sup> -Na(1)-F(1) <sup>#10</sup> | 74.75(8)   |
| O(1) <sup>#3</sup> -Gd(1)-O(3) <sup>#6</sup> | 66.99(8)  | O(4) <sup>#5</sup> -Na(1)-F(1) <sup>#9</sup>  | 70.18(8)   |
| O(1) <sup>#3</sup> -Gd(1)-O(3) <sup>#1</sup> | 108.79(8) | O(4) <sup>#8</sup> -Na(1)-F(1) <sup>#10</sup> | 70.18(8)   |
| O(1) <sup>#1</sup> -Gd(1)-O(3) <sup>#1</sup> | 51.90(7)  | O(4) <sup>#8</sup> -Na(1)-F(1) <sup>#9</sup>  | 74.75(8)   |
| O(2) <sup>#5</sup> -Gd(1)-F(1) <sup>#4</sup> | 109.63(7) | O(4) <sup>#5</sup> -Na(1)-O(2) <sup>#4</sup>  | 96.07(8)   |
| O(2) <sup>#5</sup> -Gd(1)-O(1) <sup>#3</sup> | 70.10(8)  | O(4) <sup>#8</sup> -Na(1)-O(2) <sup>#4</sup>  | 87.12(8)   |
| O(2) <sup>#5</sup> -Gd(1)-O(1) <sup>#1</sup> | 78.42(8)  | O(4) <sup>#8</sup> -Na(1)-O(2) <sup>#3</sup>  | 96.07(8)   |
| O(2) <sup>#5</sup> -Gd(1)-O(3) <sup>#6</sup> | 132.84(8) | O(4) <sup>#5</sup> -Na(1)-O(2) <sup>#3</sup>  | 87.12(8)   |
| O(2) <sup>#5</sup> -Gd(1)-O(3) <sup>#1</sup> | 71.90(8)  | O(4) <sup>#5</sup> -Na(1)-O(4) <sup>#8</sup>  | 139.82(13) |

Symmetry transformations used to generate equivalent atoms:

|                                  |                              |                                 |
|----------------------------------|------------------------------|---------------------------------|
| #1 $-x + 3/2, y + 1/2, -z + 3/2$ | #2 $x, y - 1, z$             | #3 $x, -y + 1, z - 1/2$         |
| #4 $-x + 1, -y + 1, -z + 1$      | #5 $x, y + 1, z$             | #6 $-x + 3/2, -y + 1/2, -z + 1$ |
| #7 $-x + 3/2, y - 1/2, -z + 3/2$ | #8 $-x + 1, y + 1, -z + 1/2$ | #9 $-x + 1, -y + 2, -z + 1$     |
| #10 $x, -y + 2, z - 1/2$         | #11 $x, -y + 1, z + 1/2$     | #12 $-x + 1, y, -z + 1/2$       |



**Table S6.** Selected bond lengths (Å) and angles (°) for NaLa<sub>2</sub>(SO<sub>4</sub>)<sub>2</sub>F<sub>3</sub>.

| Selected bond lengths                        |            |                                              |            |
|----------------------------------------------|------------|----------------------------------------------|------------|
| La(1)-F(1)                                   | 2.3838(11) | Na(1)-O(2)                                   | 2.4836(19) |
| La(1)-F(2) <sup>#3</sup>                     | 2.4921(14) | Na(1)-O(3) <sup>#14</sup>                    | 2.612(2)   |
| La(1)-F(2)                                   | 2.4155(14) | Na(1)-O(3) <sup>#5</sup>                     | 2.612(2)   |
| La(1)-F(2) <sup>#4</sup>                     | 2.5801(15) | Na(1)-F(1)                                   | 2.311(2)   |
| La(1)-O(1) <sup>#1</sup>                     | 2.6951(17) | Na(1)-F(2) <sup>#12</sup>                    | 2.5801(19) |
| La(1)-O(1) <sup>#5</sup>                     | 2.5702(16) | Na(1)-F(2) <sup>#13</sup>                    | 2.5801(19) |
| La(1)-O(2) <sup>#6</sup>                     | 2.5334(16) | S(1)-O(1)                                    | 1.4862(17) |
| La(1)-O(3) <sup>#7</sup>                     | 2.5710(16) | S(1)-O(2)                                    | 1.4661(17) |
| La(1)-O(4) <sup>#1</sup>                     | 2.7282(18) | S(1)-O(3)                                    | 1.4650(16) |
| La(1)-O(4) <sup>#8</sup>                     | 2.6101(18) | S(1)-O(4)                                    | 1.4716(18) |
| Na(1)-O(2) <sup>#7</sup>                     | 2.4836(19) |                                              |            |
| Selected bond angles                         |            |                                              |            |
| F(1)-La(1)-F(2) <sup>#4</sup>                | 65.96(4)   | O(2) <sup>#6</sup> -La(1)-O(3) <sup>#7</sup> | 140.31(6)  |
| F(1)-La(1)-F(2)                              | 95.21(4)   | O(2) <sup>#6</sup> -La(1)-O(4) <sup>#1</sup> | 72.69(6)   |
| F(1)-La(1)-F(2) <sup>#3</sup>                | 67.40(5)   | O(2) <sup>#6</sup> -La(1)-O(4) <sup>#8</sup> | 74.51(6)   |
| F(1)-La(1)-O(1) <sup>#5</sup>                | 70.07(5)   | O(3) <sup>#7</sup> -La(1)-F(2) <sup>#4</sup> | 109.44(6)  |
| F(1)-La(1)-O(1) <sup>#1</sup>                | 131.78(5)  | O(3) <sup>#7</sup> -La(1)-O(1) <sup>#1</sup> | 78.83(6)   |
| F(1)-La(1)-O(2) <sup>#6</sup>                | 132.83(6)  | O(3) <sup>#7</sup> -La(1)-O(4) <sup>#1</sup> | 72.52(6)   |
| F(1)-La(1)-O(3) <sup>#7</sup>                | 71.95(6)   | O(3) <sup>#7</sup> -La(1)-O(4) <sup>#8</sup> | 132.61(6)  |
| F(1)-La(1)-O(4) <sup>#8</sup>                | 109.85(4)  | O(4) <sup>#8</sup> -La(1)-O(1) <sup>#1</sup> | 65.27(5)   |
| F(1)-La(1)-O(4) <sup>#1</sup>                | 142.03(5)  | O(4) <sup>#8</sup> -La(1)-O(4) <sup>#1</sup> | 103.82(6)  |
| F(2)-La(1)-F(2) <sup>#3</sup>                | 119.01(5)  | O(2)-S(1)-O(1)                               | 110.88(10) |
| F(2)-La(1)-F(2) <sup>#4</sup>                | 61.30(6)   | O(2)-S(1)-O(4)                               | 111.31(11) |
| F(2) <sup>#3</sup> -La(1)-F(2) <sup>#4</sup> | 58.23(6)   | O(3)-S(1)-O(1)                               | 109.48(11) |
| F(2) <sup>#4</sup> -La(1)-O(1) <sup>#1</sup> | 162.15(5)  | O(3)-S(1)-O(2)                               | 109.15(11) |
| F(2)-La(1)-O(1) <sup>#1</sup>                | 109.60(5)  | O(3)-S(1)-O(4)                               | 111.51(11) |
| F(2) <sup>#3</sup> -La(1)-O(1) <sup>#5</sup> | 90.04(5)   | O(4)-S(1)-O(1)                               | 104.44(10) |
| F(2) <sup>#3</sup> -La(1)-O(1) <sup>#1</sup> | 125.75(5)  | F(1)-Na(1)-F(2) <sup>#13</sup>               | 151.41(3)  |
| F(2)-La(1)-O(1) <sup>#5</sup>                | 140.21(5)  | F(1)-Na(1)-F(2) <sup>#12</sup>               | 151.41(3)  |
| F(2)-La(1)-O(2) <sup>#6</sup>                | 76.70(5)   | F(1)-Na(1)-O(2) <sup>#7</sup>                | 109.39(5)  |
| F(2) <sup>#3</sup> -La(1)-O(2) <sup>#6</sup> | 76.29(5)   | F(1)-Na(1)-O(2)                              | 109.39(5)  |

|                                              |           |                                                |            |
|----------------------------------------------|-----------|------------------------------------------------|------------|
| F(2)-La(1)-O(3) <sup>#7</sup>                | 69.63(5)  | F(1)-Na(1)-O(3) <sup>#5</sup>                  | 85.25(5)   |
| F(2) <sup>#3</sup> -La(1)-O(3) <sup>#7</sup> | 138.95(6) | F(1)-Na(1)-O(3) <sup>#14</sup>                 | 85.25(4)   |
| F(2)-La(1)-O(4) <sup>#8</sup>                | 150.23(5) | F(2) <sup>#12</sup> -Na(1)-F(2) <sup>#13</sup> | 57.17(7)   |
| F(2) <sup>#4</sup> -La(1)-O(4) <sup>#1</sup> | 115.09(5) | F(2) <sup>#13</sup> -Na(1)-O(3) <sup>#14</sup> | 66.58(5)   |
| F(2) <sup>#3</sup> -La(1)-O(4) <sup>#8</sup> | 60.64(5)  | F(2) <sup>#12</sup> -Na(1)-O(3) <sup>#14</sup> | 122.88(6)  |
| F(2) <sup>#4</sup> -La(1)-O(4) <sup>#8</sup> | 114.12(5) | F(2) <sup>#12</sup> -Na(1)-O(3) <sup>#5</sup>  | 66.58(5)   |
| F(2)-La(1)-O(4) <sup>#1</sup>                | 59.79(5)  | F(2) <sup>#13</sup> -Na(1)-O(3) <sup>#5</sup>  | 122.88(6)  |
| F(2) <sup>#3</sup> -La(1)-O(4) <sup>#1</sup> | 148.24(5) | O(2)-Na(1)-F(2) <sup>#13</sup>                 | 75.59(6)   |
| O(1) <sup>#5</sup> -La(1)-F(2) <sup>#4</sup> | 132.91(5) | O(2) <sup>#7</sup> -Na(1)-F(2) <sup>#12</sup>  | 75.59(6)   |
| O(1) <sup>#5</sup> -La(1)-O(1) <sup>#1</sup> | 64.36(6)  | O(2) <sup>#7</sup> -Na(1)-F(2) <sup>#13</sup>  | 70.48(6)   |
| O(1) <sup>#5</sup> -La(1)-O(3) <sup>#7</sup> | 70.65(6)  | O(2)-Na(1)-F(2) <sup>#12</sup>                 | 70.48(6)   |
| O(1) <sup>#1</sup> -La(1)-O(4) <sup>#1</sup> | 51.07(5)  | O(2) <sup>#7</sup> -Na(1)-O(2)                 | 141.22(10) |
| O(1) <sup>#5</sup> -La(1)-O(4) <sup>#8</sup> | 66.46(5)  | O(2) <sup>#7</sup> -Na(1)-O(3) <sup>#5</sup>   | 87.68(6)   |
| O(1) <sup>#5</sup> -La(1)-O(4) <sup>#1</sup> | 109.68(5) | O(2) <sup>#7</sup> -Na(1)-O(3) <sup>#14</sup>  | 95.48(6)   |
| O(2) <sup>#6</sup> -La(1)-F(2) <sup>#4</sup> | 69.71(5)  | O(2)-Na(1)-O(3) <sup>#14</sup>                 | 87.68(6)   |
| O(2) <sup>#6</sup> -La(1)-O(1) <sup>#5</sup> | 140.37(6) | O(2)-Na(1)-O(3) <sup>#5</sup>                  | 95.48(6)   |
| O(2) <sup>#6</sup> -La(1)-O(1) <sup>#1</sup> | 93.69(6)  | O(3) <sup>#5</sup> -Na(1)-O(3) <sup>#14</sup>  | 170.49(9)  |

Symmetry transformations used to generate equivalent atoms:

|                                             |                                            |                                         |
|---------------------------------------------|--------------------------------------------|-----------------------------------------|
| <sup>#1</sup> $x + 1/2, y + 1/2, z + 1$     | <sup>#2</sup> $x, y + 1, z$                | <sup>#3</sup> $x, -y + 2, z - 1/2$      |
| <sup>#4</sup> $-x + 1, -y + 2, -z + 2$      | <sup>#5</sup> $-x + 1, -y + 1, -z + 1$     | <sup>#6</sup> $-x + 1, y + 1, -z + 3/2$ |
| <sup>#7</sup> $-x + 1, y, -z + 3/2$         | <sup>#8</sup> $x + 1/2, -y + 3/2, z + 1/2$ | <sup>#9</sup> $x - 1/2, y - 1/2, z - 1$ |
| <sup>#10</sup> $x, y - 1, z$                | <sup>#11</sup> $-x + 1, y - 1, -z + 3/2$   | <sup>#12</sup> $x, -y + 1, z - 1/2$     |
| <sup>#13</sup> $-x + 1, -y + 1, -z + 2$     | <sup>#14</sup> $x, -y + 1, z + 1/2$        | <sup>#15</sup> $x, -y + 2, z + 1/2$     |
| <sup>#16</sup> $x - 1/2, -y + 3/2, z - 1/2$ |                                            |                                         |

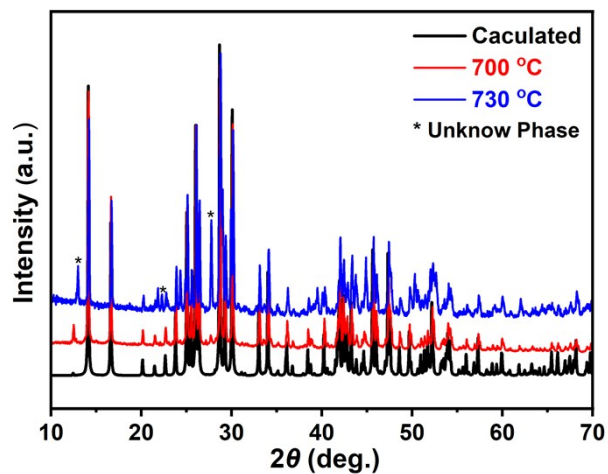

**Figure S1.** Calculated powder XRD pattern of  $\text{NaLa}_2(\text{SO}_4)_2\text{F}_3$  and the powder XRD patterns after heating at 700 and 730 °C, respectively.

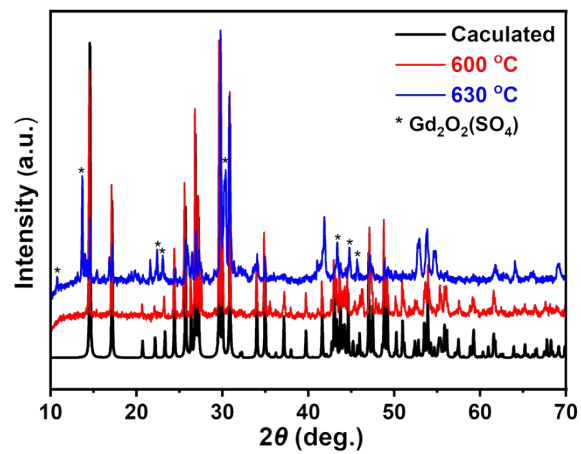

**Figure S2.** Calculated powder XRD pattern of NaGd<sub>2</sub>(SO<sub>4</sub>)<sub>2</sub>F<sub>3</sub> and the powder XRD patterns after heating at 600 and 630 °C, respectively.
